# Supplementary material for: A self-healable, moldable and bioactive biomaterial gum for personalised and wearable drug delivery
Source: Royal Society of Chemistry journal article supplement (doi:10.1039/c9tb02156f), 2020-01-01
Supplement: c9tb02156f1.pdf [file c9tb02156f1.pdf]

## **An autonomous self-healable, moldable and bioactive biomaterial gum: a potential candidate for personalised wearable drug delivery**

Mohammad-Ali Shahbazi, Neha Shrestha, Malgorzata Karolina Pierchala, Firoz Babu Kadumudi, Mehdi Mehrali, Masoud Hasany, Véronique Préat, Sander Leeuwenburgh, Alireza Dolatshahi-Pirouz\*

Dr. Mohammad-Ali Shahbazi

Department of Micro- and Nanotechnology, Technical University of Denmark, Ørstedes Plads, DK-2800 Kgs, Lyngby, Denmark

Department of Pharmaceutical Nanotechnology, School of Pharmacy, Zanzan University of Medical Sciences, Zanzan, Iran

Dr. Neha Shrestha

Université catholique de Louvain, Louvain Drug Research Institute, Advanced Drug Delivery and Biomaterials, 1200 Brussels, Belgium

Mrs. Malgorzata Karolina Pierchala

Technical University of Denmark, DTU Nanotech, Center for Intestinal Absorption and Transport of Biopharmaceutical, 2800 Kgs, Denmark.

Prof. Firoz Babu Kadumudi,

Technical University of Denmark, DTU Nanotech, Center for Intestinal Absorption and Transport of Biopharmaceutical, 2800 Kgs, Denmark.

Dr. Mehdi Mehrali

Technical University of Denmark, DTU Nanotech, Center for Intestinal Absorption and Transport of Biopharmaceutical, 2800 Kgs, Denmark.

Dr. Masoud Hasany

Technical University of Denmark, DTU Nanotech, Center for Intestinal Absorption and Transport of Biopharmaceutical, 2800 Kgs, Denmark.

Prof. Véronique Préat

Université catholique de Louvain, Louvain Drug Research Institute, Advanced Drug Delivery and Biomaterials, 1200 Brussels, Belgium

Prof. Sander Leeuwenburgh

Department of Dentistry – Regenerative Biomaterials, Radboud University Medical Center, Philips van Leydenlaan 25, Nijmegen 6525 EX, The Netherlands.

Prof. Alireza Dolatshahi Pirouz

Technical University of Denmark, DTU Nanotech, Center for Intestinal Absorption and Transport of Biopharmaceutical, 2800 Kgs, Denmark. Department of Dentistry - Regenerative Biomaterials, Radboud University Medical Center, Philips van Leydenlaan 25, Nijmegen 6525 EX, The Netherlands.

Corresponding author: Alireza Dolatshahi-Pirouz, e-mail: aldo@nanotech.dtu.dk

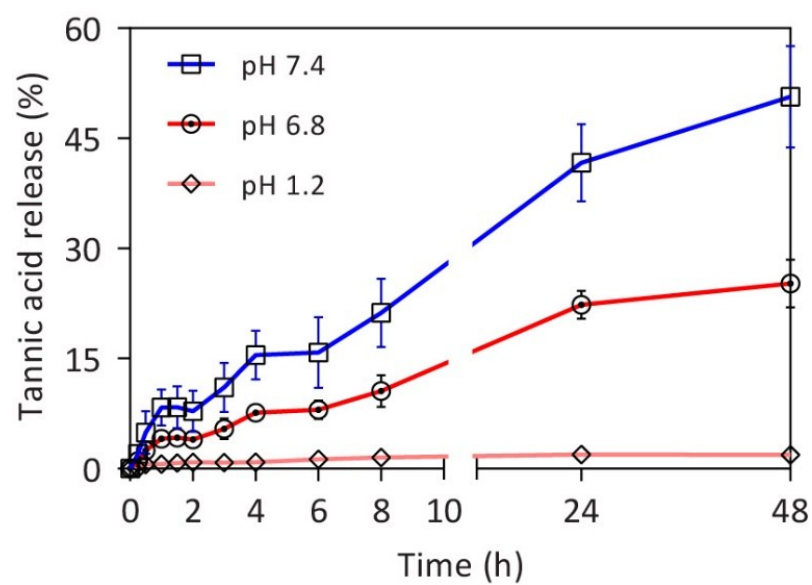

**Figure S1. TA-release profile from PATA.** The release rate of TA was highly pH-dependent and significantly higher at a neutral vs. acidic pH.

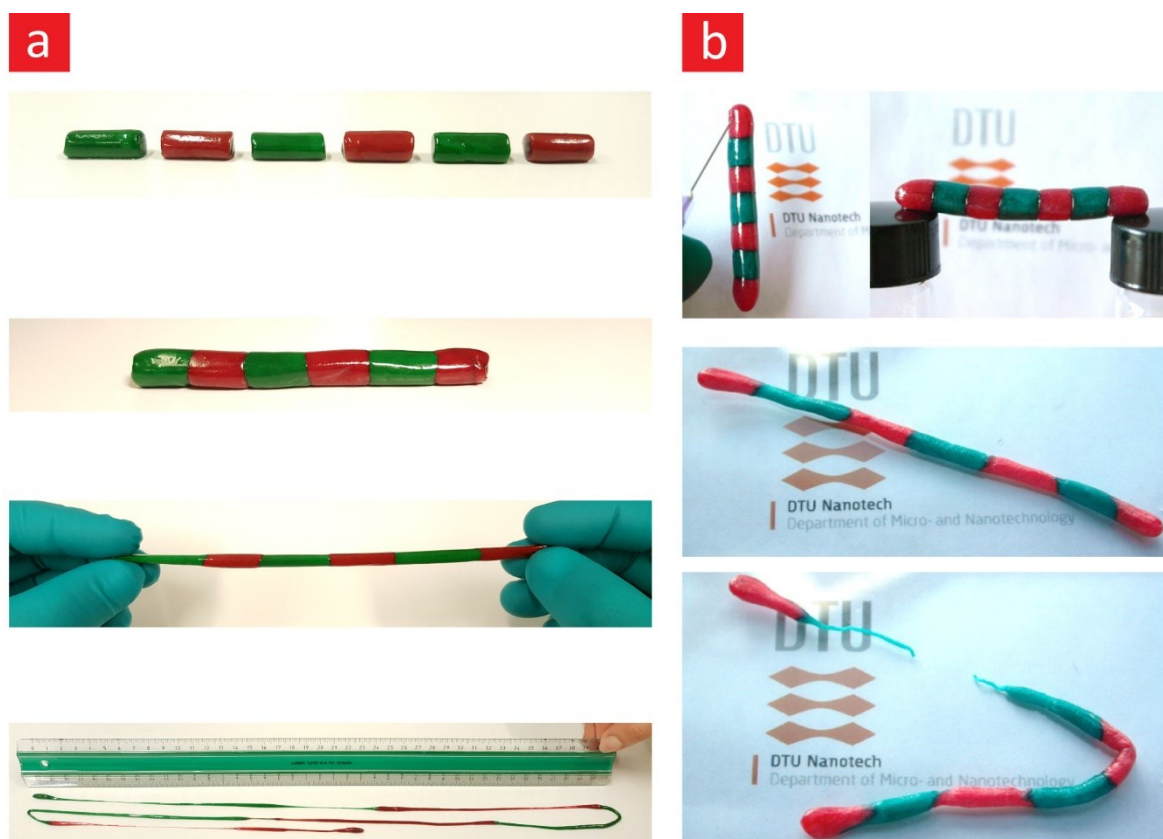

**Figure S2. Self-healing and stretchability** (a) Self-healing properties and stretchability of PATA. (b) After self-healing, the gel remained at ambient temperature for 5 min before testing the stretchability of the gel, which resulted in its breakage from the internal body of the green area rather than the connected interface.

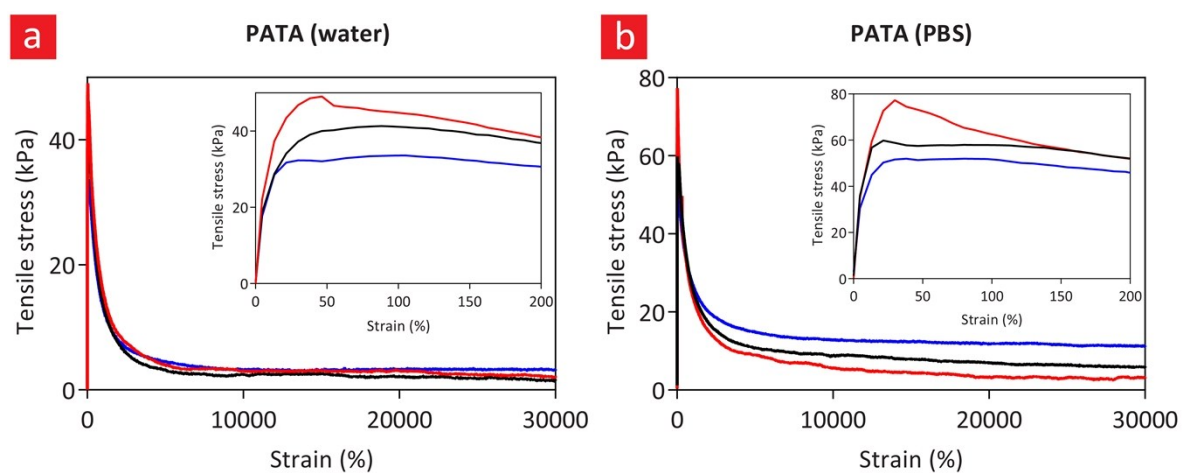

**Figure S3. Comparison of stress-strain curves for three replicates of (a) PATA (water) and (b) PATA (PBS).** Evidently PATA could stretch up to a value of 30000 % in a consistent manner without sample-to-sample variations.

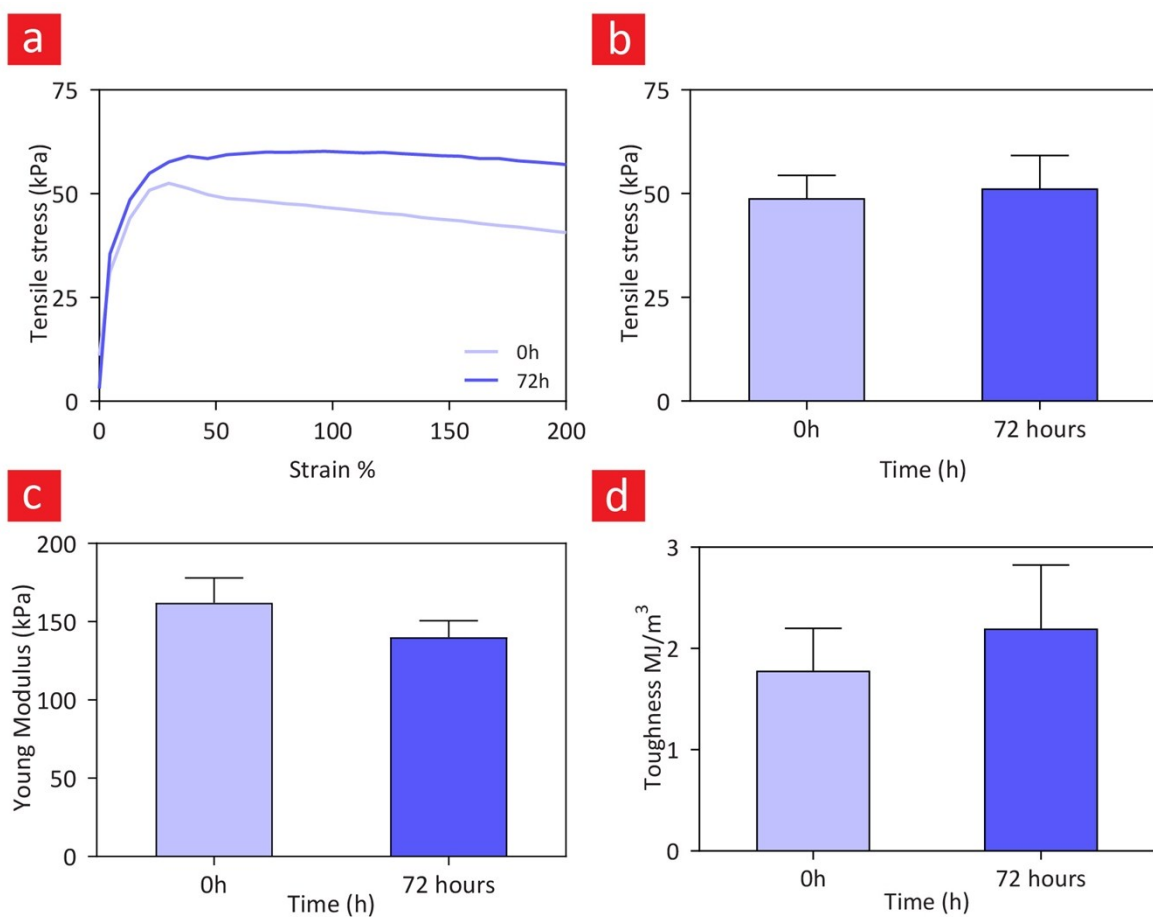

**Figure S4. Mechanical properties of PATA after TA release.** (a) Stress-strain curves, (b) tensile stress, (c) elastic modulus and (d) toughness corresponding to the mechanical experiments performed after TA from the PATA (PBS, pH 7.4). Experiments were performed by changing the release media every 24 h for 3 consecutive days (72 h).

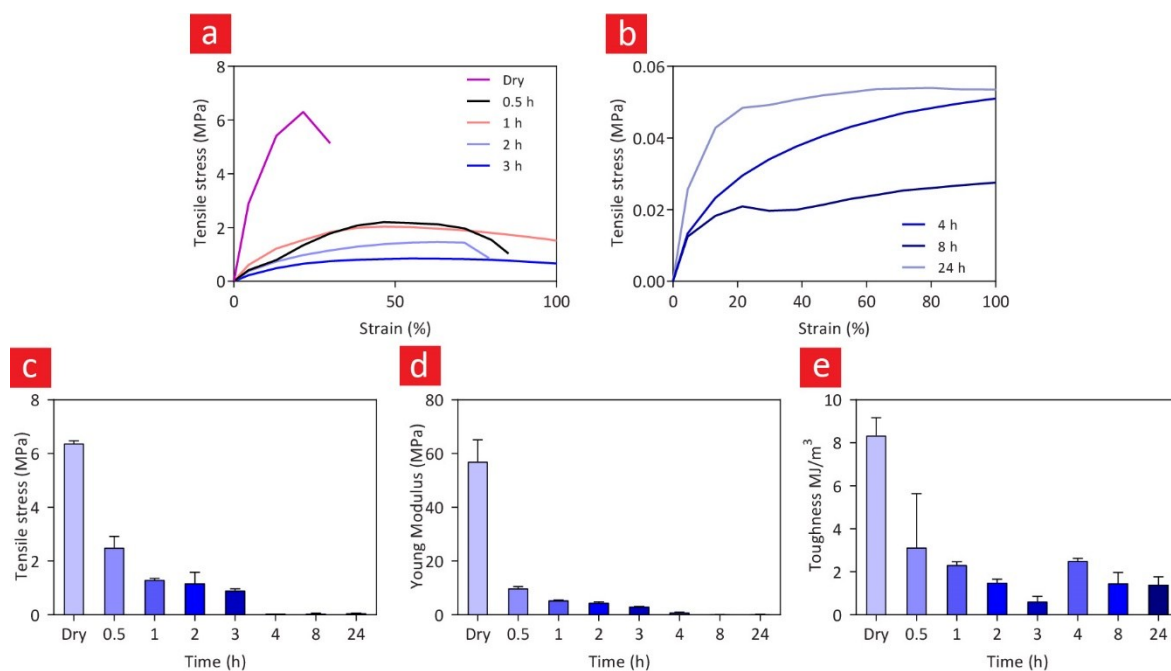

**Figure S5.** Mechanical properties of PATA after a dehydration-hydration cycle. (a,b) Stress-strain curves, (c) tensile stress, (d) Young Modulus and (e) toughness corresponding to mechanical experiments performed on PATA PBS) after drying the samples and soaking them in water for different time intervals (0.5 h, 1 h, 2 h, 3 h, 4 h, 8 h, 24h).

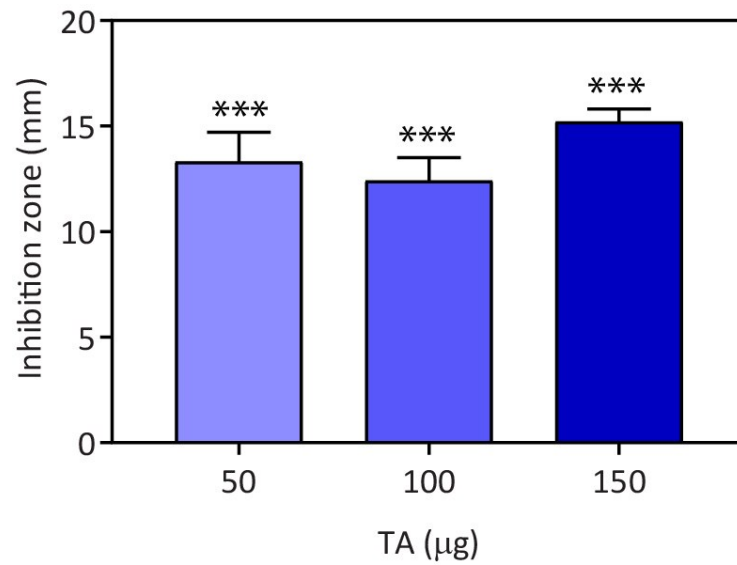

**Figure S6. TA and inhibition zones.** Quantitative representation of *S. aureus* associated inhibition zones in response to 50, 100, and 150 µg of TA dissolved in 60 µl of the PBS buffer. In brief, TA was added to paper discs, which subsequently were placed on the bacteria contaminated agar plate to enable the TA solution to gradually penetrate through the disk and reach the bacteria.

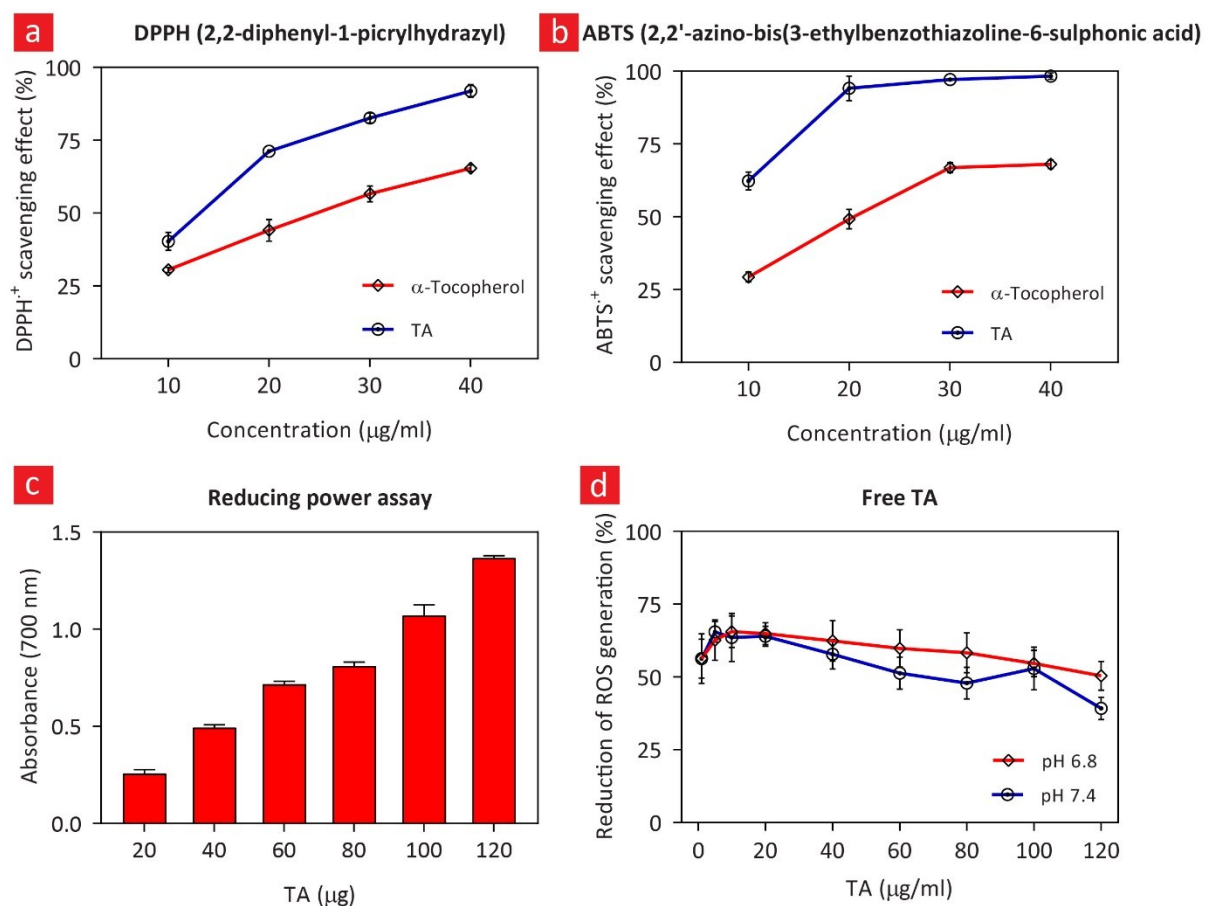

**Figure S7. Anti-inflammatory properties of free TA.** (a) DPPH scavenging effect, (b) ABTS<sup>•+</sup> scavenging effect and (f) reducing power of known concentrations of TA. (g) Anti-ROS activity of the known concentrations of TA dissolved in PBS buffer with pH values of 6.8 and 7.4.



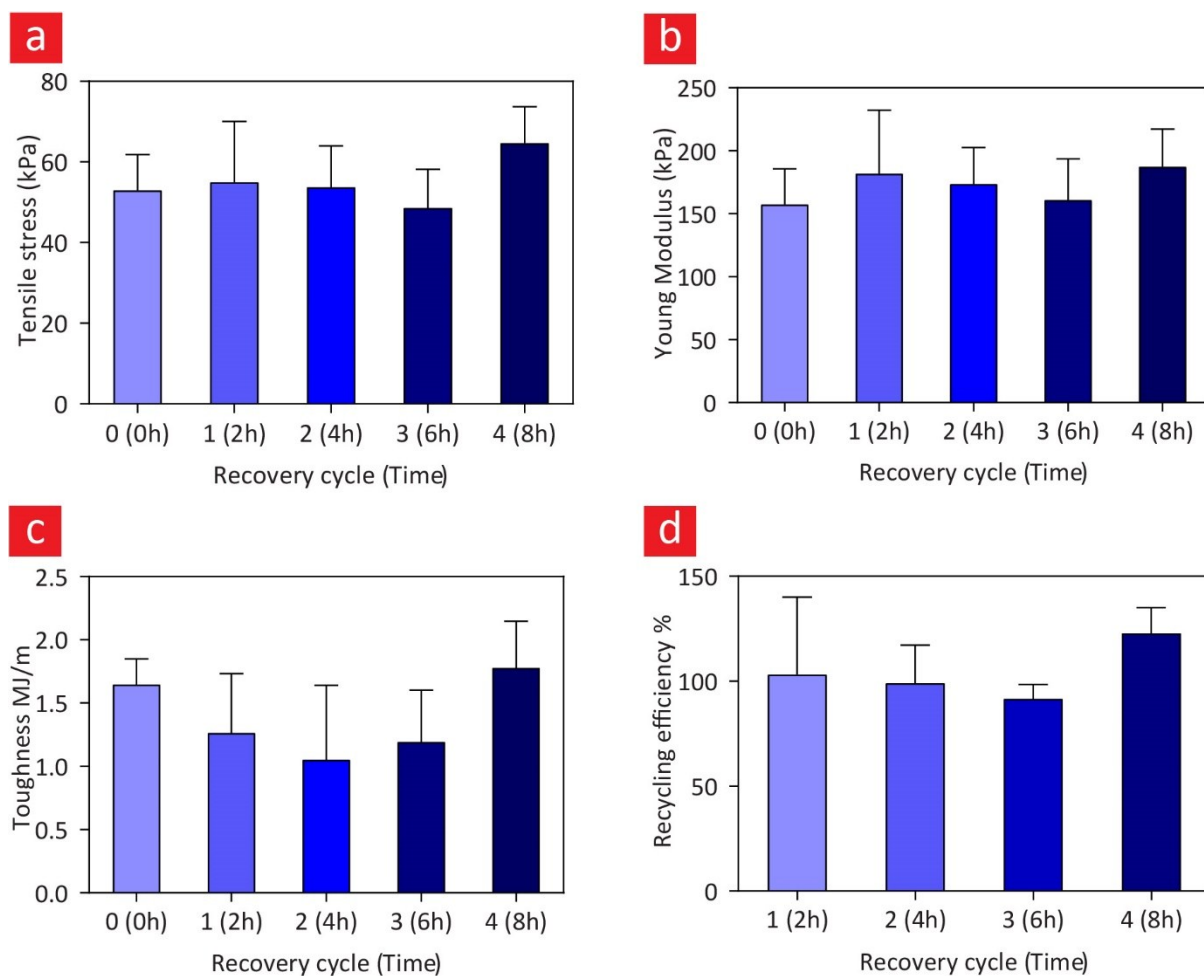

**Figure S8. Mechanical properties of PATA after doxepin loading.** (a) Tensile stress, (b) elastic modulus (c) Toughness and (d) Recycling efficiency of doxepin loaded PATA (PBS) performed every 2 hours.

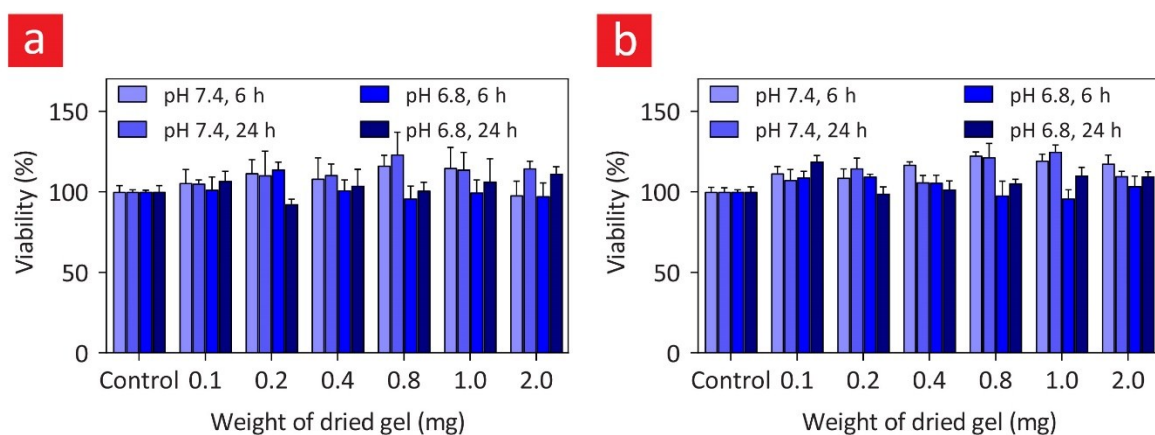

**Figure S9. Cell Viability studies.** Viability of (a) Caco-2 epithelial cells and (b) CAL 27 epithelial cells cultured at two different pH values for 6 h and 24 h and with various amounts of PATA.
